# Supplementary material for: Bioinformatics and Functional Analysis of a New Nuclear Localization Sequence of the Influenza A Virus Nucleoprotein
Source: MDPI journal article supplement (doi:10.3390/cells11192957), 2022-09-22
Supplement: s1 [file s1]

**Supplementary Figures and Tables**

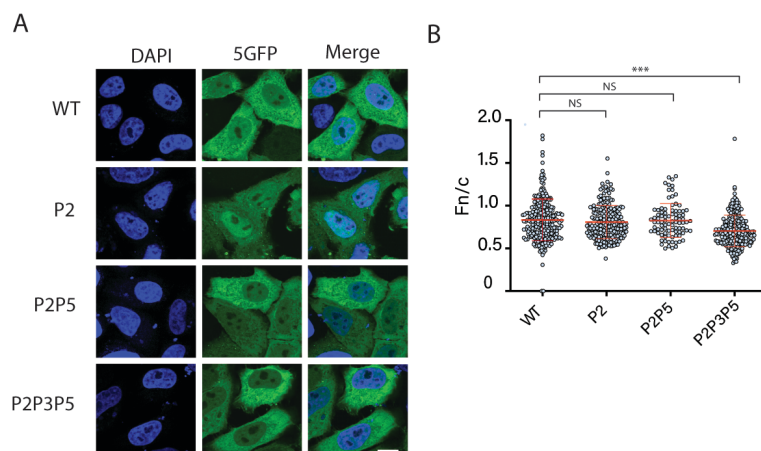

**Figure S1.** Functional analysis of the three NLS2 variants absent in influenza A virus NP. **(A)** Confocal images of HeLa cells transfected with plasmids expressing 5GFP or three remaining NLS2 variants fused to 5GFP 24 hours post-transfection. Nuclei were stained with DAPI. Scale bar, 10  $\mu$ m. **(B)** Quantification of the ratio of nuclear to cytoplasmic fluorescence (Fn/c) from the experimental conditions shown in B. Shown is the means  $\pm$  standard error of the means scored from 85-100 cells for each condition from three independent experiments. (NS, not significant; \*\*\* $p < 0.001$ , one-way ANOVA followed by Tukey's tests).

**Table S1.** NLS2 variants located at NP amino acid residues different than 212-216.

| NLS2 Variant | Location of NLS2 in the Protein | Accession Number                                                                                                                                                                                                                                                                                                                                                                                                                                                                                                                                                                                               |
|--------------|---------------------------------|----------------------------------------------------------------------------------------------------------------------------------------------------------------------------------------------------------------------------------------------------------------------------------------------------------------------------------------------------------------------------------------------------------------------------------------------------------------------------------------------------------------------------------------------------------------------------------------------------------------|
| WT           | 218 to 222                      | BAL70445.1, BAL70455.1, BAK41897.1                                                                                                                                                                                                                                                                                                                                                                                                                                                                                                                                                                             |
| P3           | 213 to 217                      | ADU16942.1, ADU53204.1                                                                                                                                                                                                                                                                                                                                                                                                                                                                                                                                                                                         |
| P3           | 218 to 222                      | ACU51033.1, ACU51030.1, BAM78353.1, ATW75159.1, ABY81789.2, ANZ03693.1, ANK78256.1, BAM78385.1, ATW75162.1, AAN46830.1, AAV30838.1, 2Q06_A, 2Q06_B, ATW75160.1, ABY70960.1, BAK41893.1, BAK41894.1, BAK41895.1, BAK41896.1, BAK41898.1, ATW75163.1, ATW75164.1, ATW75165.1, ATW75166.1, ABF48471.1, BAM65747.1, ATW75168.1, BAM78369.1, ACU51029.1, ACU51031.1, ATW75155.1, ATW75156.1, ATW75158.1, BAL70427.1, ADI52818.1, ADI52820.1, BAL70465.1, AEX30601.1, ATW75169.1, ATW75157.1, BAG49623.1, ALT19014.1, ACR01026.1, ATW75167.1, BAM78401.1, AAV30830.1, ACU51032.1, ACU51034.1, ACU51035.1, APP91838.1 |

**Table S2.** BLASTP E-values for influenza A NP and proteins from DNA virus families reported in Figures 2 and 4 <sup>1</sup>.

| Variant                  | Influenza A NP  | Adenoviridae   | Herpesviridae  | Circoviridae  | Hepadnaviridae |
|--------------------------|-----------------|----------------|----------------|---------------|----------------|
| WT                       | 224.0 $\pm$ 0.0 | No hit         | No hit         | No hit        | No hit         |
| P2                       | No hit          | 13.0 $\pm$ 0.0 | 71.0 $\pm$ 0.0 | No hit        | No hit         |
| P3                       | 158.0 $\pm$ 0.0 | 6.7 $\pm$ 0.1  | 35.0 $\pm$ 0.0 | 2.2           | No hit         |
| P5                       | 318.0 $\pm$ 0.0 | No hit         | 71.0 $\pm$ 0.0 | No hit        | No hit         |
| P2P3                     | 224.0 $\pm$ 0.0 | 9.2 $\pm$ 0.0  | 50.0 $\pm$ 0.0 | No hit        | No hit         |
| P2P5                     | No hit          | No hit         | Not hit        | No hit        | No hit         |
| P3P5                     | 224.1 $\pm$ 0.0 | 9.2 $\pm$ 0.0  | No hit         | No hit        | No hit         |
| P2P3P5                   | No hit          | No hit         | No hit         | No hit        | 78.0 $\pm$ 0.0 |
| Random peptide (GLVTV)   | No hit          | No hit         | No hit         | 6.9 $\pm$ 0.0 | No hit         |
| SV40 Large T-antigen NLS | No hit          | No hit         | No hit         | No hit        | No hit         |

<sup>1</sup> Mean of E-value  $\pm$  standard error of the mean are listed.

**Table S3.** Proteins from DNA virus families containing variants of the sequence GRKTR.

| GRKTR Variant                | Protein                                               | Accession Number                                                                                                                                                                                                                                                                                                                                                                                                   |
|------------------------------|-------------------------------------------------------|--------------------------------------------------------------------------------------------------------------------------------------------------------------------------------------------------------------------------------------------------------------------------------------------------------------------------------------------------------------------------------------------------------------------|
| <i>Adenoviridae</i> family   |                                                       |                                                                                                                                                                                                                                                                                                                                                                                                                    |
| P2                           | Minor core protein pV                                 | AQQ73631                                                                                                                                                                                                                                                                                                                                                                                                           |
|                              | Viral RNA splicing factor L4-33 kDa                   | YP_009373251, ART33376                                                                                                                                                                                                                                                                                                                                                                                             |
|                              | Viral transcription factor L4-22 kDa                  | YP_002822221, ACJ14521, YP_002822220, ACJ14522                                                                                                                                                                                                                                                                                                                                                                     |
| P3                           | Precursor terminal protein pTP                        | YP_007518314, AEK98448, QHR77492                                                                                                                                                                                                                                                                                                                                                                                   |
|                              | Encapsidation protein L1-52/55 kDa                    | QJC19249                                                                                                                                                                                                                                                                                                                                                                                                           |
|                              | Late L2 mu core protein pX                            | AWB14650, YP_004123745, ADR77841, AP_000057, AAB05441, P68974, P68975                                                                                                                                                                                                                                                                                                                                              |
| P2P3                         | Minor core protein pV                                 | AJE59778, AGT76023, AJE59852, AKQ98460, AJE59724, AJE59783, AJE59788, AJE59808, AKQ98454, AFQ34581, AJE59813, AFQ34346, AGT76107, AGT77115, AFQ34307, AJE59734, AJE59798, AJE59719, AJE59754, AJE59759, AJE59769, AKQ98442, AJE59803, AGT77293, AJE59709, AJE59764, AGT76151, AGT75892, AGT76065, AGT76536, AJE59857, AJE59862, AKQ98376, AAZ13829, AFQ34385, AGT75547                                             |
| P3P5                         | Hexon-associated structural protein (pVIII precursor) | AGT75675, AUN87399, AFQ34424, AJE59867, AJE59739, AJE59744, AAZ15253, AJE59881, AJE59895, AKQ98448, YP_002213776, AJE59876, AKQ98418, AET87309, AAW33441, AAW33258, ANQ44536, AAW33166, ABB1780, QEQ50111, QEQ50148, AMB61156, AP_000545, AAR89960, AAT97584, QBG39296, QEQ50074, AMB61089, QID75502, AAT97543, ACX32405, AEC11867, AAW33399, AMB61124, AYI99658, AET87268, AET87227, AET87145, AET87186, QFR07974 |
| <i>Herpesviridae</i> family  |                                                       |                                                                                                                                                                                                                                                                                                                                                                                                                    |
| WT                           | Tegument protein UL37                                 | YP_00917690, AIU39240, AKV40709, AIU39350, AKI81626, AKI81730, AAY59063                                                                                                                                                                                                                                                                                                                                            |
| P2                           | GP84                                                  | CDI95420, YP_007417850, AGE11554, BAJ78542                                                                                                                                                                                                                                                                                                                                                                         |
| P2                           | DNA polymerase processivity subunit                   | ACY41129, NP_044897, AAB66449, CAA70274                                                                                                                                                                                                                                                                                                                                                                            |
| P3                           | Tegument protein VP22                                 | BBM13221                                                                                                                                                                                                                                                                                                                                                                                                           |
| P5                           | Tegument protein UL32                                 | AEQ32128                                                                                                                                                                                                                                                                                                                                                                                                           |
| P2P3                         | Assembly protein M80                                  | CCE57080, AWW68505, ADD10452, CCE56751, CCE56914, CCE57244, YP_214083, AAA46000, AQQ81427, AWW68681, CCE56585, CCE57408, AAA46001, CAP08120, ACE95421, ACE95257, ACE95585                                                                                                                                                                                                                                          |
| <i>Circoviridae</i> family   |                                                       |                                                                                                                                                                                                                                                                                                                                                                                                                    |
| P3                           | Capsid protein                                        | QFR58250                                                                                                                                                                                                                                                                                                                                                                                                           |
| <i>Hepadnaviridae</i> family |                                                       |                                                                                                                                                                                                                                                                                                                                                                                                                    |
| P2P5                         | X protein                                             | AGO96886                                                                                                                                                                                                                                                                                                                                                                                                           |

**Table S4.** Nuclear proteins containing variants of the sequence GRKTR found only in humans and their predicted NLSs.

| Protein <sup>1</sup>                                              | Organism          | Putative NLS2 Variant                                                                                             | Predicted NLS <sup>2</sup>                                                                                                                                                                                                             |
|-------------------------------------------------------------------|-------------------|-------------------------------------------------------------------------------------------------------------------|----------------------------------------------------------------------------------------------------------------------------------------------------------------------------------------------------------------------------------------|
| Ubl carboxyl-terminal hydrolase 18                                | <i>H. sapiens</i> | P2:<br>234GKKTR <sup>238</sup><br>160GKKTR <sup>164</sup>                                                         | No NLS predicted                                                                                                                                                                                                                       |
| Transcriptional repressor CTCFL                                   | <i>H. sapiens</i> | P3:<br>581GRRTR <sup>585</sup><br>531GRRTR <sup>535</sup><br>376 GRRTR <sup>380</sup><br>319 GRRTR <sup>323</sup> | 576AASGK <b>GRRTR</b> KRKQTILKEATKGQKEA <sup>602</sup>                                                                                                                                                                                 |
| Sororin                                                           | <i>H. sapiens</i> | P3:<br>3 GRRTR <sup>7</sup>                                                                                       | 12AQRSGPRAPSPTKPLRRSQRK <sup>32</sup><br>212PEKQKRKKKKKMPEILSLRGRQRA <sup>234</sup>                                                                                                                                                    |
| N-lysine methyltransferase SETD6                                  | <i>H. sapiens</i> | P3:<br>46GRRTR <sup>50</sup>                                                                                      | No NLS predicted                                                                                                                                                                                                                       |
| Probable rRNA-processing protein EBP2                             | <i>H. sapiens</i> | P2P3:<br>349GKRTR <sup>353</sup><br>294GKRTR <sup>298</sup>                                                       | 277QRKKAGAKGQQMRKGPSAKRRYKNQKFGF<br>GGKKKGSKW <sup>314</sup><br>328AKTAHGRGLKRPKGKGSNKR <b>PGRTR</b> EKMK<br>NRTH <sup>361</sup>                                                                                                       |
| Torsin-1A-interacting protein 1                                   | <i>H. sapiens</i> | P2P3:<br>82GKRTR <sup>86</sup>                                                                                    | No NLS predicted                                                                                                                                                                                                                       |
| Interferon-induced, double-stranded RNA-activated protein kinase] | <i>H. sapiens</i> | P2P3:<br>443GKRTR <sup>447</sup><br>402GKRTR <sup>406</sup>                                                       | No NLS predicted                                                                                                                                                                                                                       |
| Transforming growth factor beta regulator 1                       | <i>H. sapiens</i> | P2P5:<br>133GKKTK <sup>137</sup>                                                                                  | 19KARMKKLPKKSQNEKYRLKYLRRLKA <sup>44</sup><br>133 <b>GKKTK</b> KEKKEKGKNNKLEVLKKTCKKKKM<br>AGGARK <sup>168</sup>                                                                                                                       |
| Histone-lysine N-methyltransferase NSD2                           | <i>H. sapiens</i> | P2P5:<br>1218GKKTK <sup>1222</sup><br>1149GKKTK <sup>1153</sup><br>437GKKTK <sup>441</sup>                        | 164KARRNRKRS <sup>172</sup><br>1217 <b>KGKKTK</b> KKTRRRRAKGEGKRQ <sup>1237</sup><br>1339EKPPPEPGKPKGKRRRRRGWRRVTEGK <sup>1365</sup>                                                                                                   |
| Chromobox protein homolog 5                                       | <i>H. sapiens</i> | P2P5:<br>2GKKTK <sup>6</sup>                                                                                      | 69KYKKMKEGNNKPREKSEGNKRKS <sup>92</sup><br>103SKKK <sup>106</sup><br>28VKKGKKDKKIKK <sup>39</sup><br>74KKKRDTRKGRRKK <sup>86</sup><br>119KPRGGKK <sup>125</sup><br>211KEPPKQGKEKAKK <sup>223</sup><br>518KKLKELKAGGKSTK <sup>531</sup> |
| ATP-binding cassette sub-family F member 1                        | <i>H. sapiens</i> | P2P5:<br>123GKKTK <sup>127</sup>                                                                                  |                                                                                                                                                                                                                                        |
| Cyclin-F                                                          | <i>H. sapiens</i> | P3P5:<br>567GRRTK <sup>571</sup><br>259GRRTK <sup>263</sup>                                                       | 21RRIRRR <sup>26</sup>                                                                                                                                                                                                                 |

<sup>1</sup> All listed proteins are known to function in the cell nucleus.<sup>2</sup> NLSs were predicted using NLStradamus (Nguyen et al. 2009; BMC Bioinformatics. 10:202). Overlapping regions of the predicted NLSs containing GRKTR or its variants are highlighted in red.

**Table S5.** Nuclear proteins from different cellular organisms containing the sequence GRKTR or its variants and their predicted NLSs.

| Protein. <sup>1</sup>                                 | Species                             | Putative NLS2 Variant                                                                                          | Predicted NLS. <sup>2</sup>                                                                                                                                 |
|-------------------------------------------------------|-------------------------------------|----------------------------------------------------------------------------------------------------------------|-------------------------------------------------------------------------------------------------------------------------------------------------------------|
| Suppressor of mec-8 and unc-52 protein                | <i>G. max</i>                       | WT:<br>513GRKTR <sup>517</sup><br>515GRKTR <sup>517</sup>                                                      | 6KKNPKEKPIRRKEEKPEEPEVPKYRDRAKER <sup>36</sup><br>215GKILKKKRKEKDAKGK <sup>230</sup>                                                                        |
| Spliceosomal protein Beag                             | <i>D. melanogaster</i>              | WT:<br>504GRKTR <sup>508</sup>                                                                                 | 77LRRKKK <sup>82</sup><br>314GGRNKKNKRDKDK <sup>327</sup>                                                                                                   |
| Methyl-CPG-binding domain protein 13                  | <i>A. thaliana</i>                  | WT:<br>54GRKTR <sup>58</sup>                                                                                   | No NLS predicted                                                                                                                                            |
| U-box domain-containing protein                       | <i>G. max</i>                       | WT:<br>509GRKTR <sup>513</sup><br>501GRKTR <sup>505</sup>                                                      | No NLS predicted                                                                                                                                            |
| Regulator of apoptosis protein XIAP-associated factor | <i>M. musculus</i>                  | WT:<br>130GRKTR <sup>134</sup>                                                                                 | No NLS predicted                                                                                                                                            |
| Atpase family AAA domain-containing protein 5         | <i>M. musculus</i>                  | P2:<br>477GKKTR <sup>481</sup>                                                                                 | 111KRKRK <sup>115</sup><br>202RKRKR <sup>206</sup><br>466PKEKSKKPNKKGKKTR <sup>481</sup><br>654PKSKSKSSKK <sup>663</sup><br>1543LRKSQKRKQKK <sup>1553</sup> |
| Transcription factor Scarecrow-like protein 14        | <i>G. max</i>                       | P2:<br>289GKKTR <sup>293</sup>                                                                                 | 290KKTRSKKGS <sup>298</sup>                                                                                                                                 |
| Origin of replication complex subunit 1               | <i>G. max</i>                       | P2:<br>579GKKTR <sup>583</sup><br>576GKKTR <sup>580</sup>                                                      | 106KKK <sup>108</sup><br>132RKREGEQGVVTRAKRRKSENREKS AKLP <sup>159</sup>                                                                                    |
| Lysine-specific demethylase 6B                        | <i>M. musculus</i>                  | P2:<br>1069GKKTR <sup>1073</sup>                                                                               | 972GSGKRRQKEHRRHRRACRDSVGRRPREGRAKAKAKAPKEKS<br>RR <sup>1014</sup>                                                                                          |
| Kinase regulator Mob2                                 | <i>D. melanogaster</i>              | P2:<br>394GKKTR <sup>398</sup><br>232GKKTR <sup>236</sup><br>203GKKTR <sup>207</sup><br>97GKKTR <sup>101</sup> | 972GSGKRRQKEHRRHRRACRDSVGRRPREGRAKAKAKAPKEKS<br>RR <sup>1014</sup>                                                                                          |
| Ethylene-responsive transcription factor 9            | <i>G. max</i><br><i>A. thaliana</i> | P2:<br>46GKKTR <sup>50</sup><br>45GKKTR <sup>49</sup><br>43GKKTR <sup>47</sup><br>42GKKTR <sup>45</sup>        | No NLS predicted                                                                                                                                            |
| SMAD/FHA domain-containing transcription factor       | <i>A. thaliana</i>                  | P2:<br>183GKKTR <sup>187</sup>                                                                                 | No NLS predicted                                                                                                                                            |
| Smg-4/UPF3 family protein                             | <i>A. thaliana</i>                  | P3:<br>185GRRTR <sup>189</sup>                                                                                 | 182RRGGRTRVVSANKPSRPSKRNSEKKKYVEK <sup>213</sup>                                                                                                            |
| Lupus La protein homolog                              | <i>M. musculus</i>                  | P3:<br>374GRRTR <sup>378</sup><br>373GRRTR <sup>377</sup>                                                      | 199SKVEAKLKAKQ <sup>209</sup><br>329KSKGGHAGGRFGSHVFTAARRFKGKGKGNRPGYAGAPKG<br>RGQFHGRTRFDGDDRRRGP MKRGRDGRDREEP ASKHKKREN<br>GARDK <sup>415</sup>          |
| Recq-mediated genome instability protein 1            | <i>G. max</i>                       | P3:<br>263GRRTR <sup>267</sup>                                                                                 | 255LKKPPRPRGRTR <sup>267</sup>                                                                                                                              |
| E3 ubiquitin-protein ligase RNF169                    | <i>D. rerio</i>                     | P3:<br>190GRRTR <sup>194</sup>                                                                                 | 526RRGKKRSQK <sup>534</sup>                                                                                                                                 |
| Inflammatory response factor strawberry notch homolog | <i>C. elegans</i>                   | P2:<br>1789GRRTR <sup>1793</sup>                                                                               | 1253KDRKAKKRKRDEEEAERLREKVRKREERREKKRRRAIRRAER<br>EKQRR <sup>1299</sup>                                                                                     |

|                                                                        |                                     |                                                                                                                                                                                                                |                                                                                                                                                                                 |
|------------------------------------------------------------------------|-------------------------------------|----------------------------------------------------------------------------------------------------------------------------------------------------------------------------------------------------------------|---------------------------------------------------------------------------------------------------------------------------------------------------------------------------------|
| Protein timeless homolog                                               | <i>C. elegans</i>                   | P2:<br>173GRRTR <sup>177</sup>                                                                                                                                                                                 | 307RKAKKRAPNRR <sup>318</sup><br>520LKKVTKKVKVRKATKSK <sup>537</sup><br>1011RSRKKVA <sup>1017</sup>                                                                             |
| Myb domain-containing protein                                          |                                     | P2:<br>699GRRTR <sup>703</sup>                                                                                                                                                                                 | 283DRERDRDRERERERERDRERERERGRDR <sup>310</sup><br>556SRERSRSHSRSRSRSRSHSR <sup>577</sup><br>621KRKSGGDDGKDVKRRKTGS <sup>639</sup>                                               |
| Nuclear inhibitor of protein phosphatase 1                             | <i>D. melanogaster</i>              | P2:<br>186GRRTR <sup>190</sup>                                                                                                                                                                                 | No NLS predicted                                                                                                                                                                |
| Protein MAIN-LIKE 2-like                                               | <i>G. max</i>                       | P2:<br>23GRRTR <sup>27</sup>                                                                                                                                                                                   | No NLS predicted                                                                                                                                                                |
| Nuclear receptor corepressor 2                                         | <i>D. rerio</i>                     | P5:<br>2268GRKTK <sup>2272</sup><br>2258GRKTK <sup>2262</sup><br>2252GRKTK <sup>2256</sup><br>2242GRKTK <sup>2246</sup><br>2230GRKTK <sup>2234</sup><br>2204GRKTK <sup>2208</sup><br>1646GRKTK <sup>1650</sup> | 653KIKSEKERKARRKGKA <sup>668</sup><br>804KKEVKKKEH <sup>812</sup><br>1674REREREREREREQRERERERERERDRERDRDREREKDRDRDRE<br>R <sup>1717</sup><br>2260KSKGGRSNGRKTKS <sup>2273</sup> |
| Histone h1t                                                            | <i>M. musculus</i>                  | P5:<br>165GRKTK <sup>169</sup>                                                                                                                                                                                 | 0KPSSKRRGKKPGLAPARKPRGF <sup>41</sup><br>110LSKKAASGNDKGKGSASAKAKMGLPRASRSPKSSKTKAV<br>KKPKATPTKASGSGRKTKGAKGVQQRK-<br>SPAKARAANPNSGKAKMVMQKTDLRKAAGRK <sup>209</sup>           |
| Winged-helix DNA-binding transcription factor family protein           | <i>A. thaliana</i>                  | P5:<br>35GRKTK <sup>39</sup>                                                                                                                                                                                   | 29KKPAAKGRKTKNVKEVKEKKTVAAPKKRT <sup>58</sup>                                                                                                                                   |
| AGAMOUS-like 57                                                        | <i>A. thaliana</i>                  | P5:<br>9GRKTK <sup>13</sup>                                                                                                                                                                                    | 7AKGRKTKGKQKI <sup>18</sup>                                                                                                                                                     |
| MRX complex nuclease subunit                                           | <i>S. cerevisiae</i>                | P5:<br>650GRKTK <sup>654</sup>                                                                                                                                                                                 | 588KPKRVRTATKKKI <sup>600</sup><br>651RKTKTKTRPAASTKTASRRGKGRASRTPKTDILGSLAKKRK <sup>692</sup>                                                                                  |
| Transcription factor MIG1                                              | <i>S. cerevisiae</i>                | P5:<br>159GRKTK <sup>163</sup>                                                                                                                                                                                 | 87RRIHTNSHPRGKRGRKKK <sup>104</sup>                                                                                                                                             |
| Acyl-CoA N-acyltransferase with RING/FYVE/PHD-type zinc finger protein | <i>A. thaliana</i>                  | P5:<br>484GRKTK <sup>488</sup>                                                                                                                                                                                 | 64RRSGVDRKTLGAKEKFVRKR <sup>83</sup><br>266RKSKRKKSEYSKPKKE <sup>281</sup><br>302RRGRRGGGTDKQRL <sup>315</sup><br>396RKAKKTR <sup>402</sup>                                     |
| Topoisomerase 3alpha                                                   | <i>A. thaliana</i>                  | P5:<br>584GRKTK <sup>588</sup>                                                                                                                                                                                 | 862GRRGSRGRGRGGRGGQSSGGR <sup>882</sup>                                                                                                                                         |
| Lysine-specific demethylase 4C                                         | <i>M. musculus</i>                  | P5:<br>694GRKTK <sup>698</sup><br>677GRKTK <sup>681</sup><br>602GRKTK <sup>606</sup><br>496GRKTK <sup>500</sup>                                                                                                | 379RKKKLRKPPKSLQGNK <sup>394</sup>                                                                                                                                              |
| Probable serine/threonine-protein kinase At1g54610                     | <i>G. max</i>                       | P5:<br>523GRKTK <sup>527</sup>                                                                                                                                                                                 | 423GAKKVRVRERERG <sup>435</sup>                                                                                                                                                 |
| Caspase-14                                                             | <i>M. musculus</i>                  | P5:<br>151GRKTK <sup>155</sup>                                                                                                                                                                                 | No NLS predicted                                                                                                                                                                |
| ELM2 and Myb/SANT-like domain containing 1a                            | <i>D. rerio</i>                     | P5:<br>913GRKTK <sup>917</sup>                                                                                                                                                                                 | No NLS predicted                                                                                                                                                                |
| Mitotic deacetylase associated SANT domain protein a                   | <i>D. rerio</i>                     | P5:<br>873GRKTK <sup>877</sup>                                                                                                                                                                                 | No NLS predicted                                                                                                                                                                |
| Trithorax                                                              | <i>D. melanogaster</i>              | P5:<br>1224GRKTK <sup>1228</sup><br>856GRKTK <sup>860</sup>                                                                                                                                                    | No NLS predicted                                                                                                                                                                |
| NAC domain-containing protein 90                                       | <i>G. max</i><br><i>A. thaliana</i> | P5:<br>123GRKTK <sup>127</sup><br>125GRKTK <sup>129</sup>                                                                                                                                                      | No NLS predicted                                                                                                                                                                |

|                                                          |                        |                                                                                                                   |                                                                                                                                                                                                                                                                                   |
|----------------------------------------------------------|------------------------|-------------------------------------------------------------------------------------------------------------------|-----------------------------------------------------------------------------------------------------------------------------------------------------------------------------------------------------------------------------------------------------------------------------------|
| Protein Wiz                                              | <i>D. rerio</i>        | P2P3:<br>275GKRTR <sup>279</sup><br>269GKRTR <sup>273</sup>                                                       | 252RRKKR <sup>256</sup><br>276KRTRGRPPGKGRNKT <sup>290</sup><br>598RRKDVAFKSIGNKRGRGGRGRRRG <sup>621</sup>                                                                                                                                                                        |
| Tetratricopeptide repeat protein 27                      | <i>M. musculus</i>     | P2P3:<br>276GKRTR <sup>280</sup>                                                                                  | No NLS predicted                                                                                                                                                                                                                                                                  |
| Kinesin-like protein KIF22                               | <i>D. rerio</i>        | P2P3:<br>363GKRTR <sup>367</sup>                                                                                  | No NLS predicted                                                                                                                                                                                                                                                                  |
| Meiotic recombination protein SPO11-1                    | <i>G. max</i>          | P2P3:<br>3GKRTR <sup>7</sup>                                                                                      | No NLS predicted                                                                                                                                                                                                                                                                  |
| Transcription factor DIVARICA-TA                         | <i>G. max</i>          | P2P3:<br>74GKRTR <sup>78</sup>                                                                                    | No NLS predicted                                                                                                                                                                                                                                                                  |
| RNA polymerase III subunit C160                          | <i>D. melanogaster</i> | P2P3:<br>1236GKRTR <sup>1240</sup>                                                                                | No NLS predicted                                                                                                                                                                                                                                                                  |
| Recq-mediated instability protein (DUF1767)              | <i>A. thaliana</i>     | P2P3:<br>282GKRTR <sup>286</sup>                                                                                  | No NLS predicted                                                                                                                                                                                                                                                                  |
| DNA binding protein                                      | <i>A. thaliana</i>     | P2P3:<br>23GKRTR <sup>27</sup>                                                                                    | No NLS predicted                                                                                                                                                                                                                                                                  |
| Small subunit processome component 20 homolog            | <i>M. musculus</i>     | P2P5:<br>2506GKGTK <sup>2510</sup>                                                                                | 1321KKKKN <sup>1325</sup><br>2505K <b>GKKT</b> KKK <sup>2512</sup><br>2727KRALRKRRKAL <sup>2737</sup><br>2744DIAAKKKLKKHKNKSEAKKRKIEFLRPGYKAKRQK <sup>2778</sup>                                                                                                                  |
| Methyl-CPG-binding domain 9                              | <i>A. thaliana</i>     | P2P5:<br>1779GKGTK <sup>1783</sup>                                                                                | 734RKAKKPKL <sup>741</sup><br>916RGRK <sup>919</sup><br>1353RRK <sup>1355</sup><br>1776KKR <b>GKKT</b> K <sup>1783</sup><br>2162RVRRSKGKKRKEP <sup>2173</sup>                                                                                                                     |
| High mobility group B4                                   | <i>A. thaliana</i>     | P2P5:<br>25GKGTK <sup>29</sup>                                                                                    | 17LKTRGRKA <b>GKKT</b> KDPNQPKRP <sup>38</sup>                                                                                                                                                                                                                                    |
| FACT complex subunit ssrp1-B                             | <i>C. elegans</i>      | P2P5:<br>552GKGTK <sup>556</sup>                                                                                  | 525PKKKESKEKKNKREKKEKPVKEKAVKK <b>GKKT</b> KDPNEPK <sup>562</sup>                                                                                                                                                                                                                 |
| Galactose oxidase/kelch repeat superfamily protein       | <i>A. thaliana</i>     | P2P5:<br>2GKGTK <sup>6</sup>                                                                                      | 3 <b>KKT</b> KPGKGKEKTERKTAKADEKKARREGKKL <sup>34</sup><br>353SKDKAK <sup>358</sup><br>554KSLRRKEKRARI <sup>565</sup><br>657RKGGIAKKKR <sup>666</sup>                                                                                                                             |
| ATPase family AAA domain-containing protein 5            | <i>D. rerio</i>        | P2P5:<br>911GKGTK <sup>915</sup>                                                                                  | 93KPVRGRGQKRTRTKDKKKSK <sup>113</sup><br>182KKDGGNKKKSALRRNRKAK <sup>199</sup><br>443KKMKVVRKSGKKAQAKKA <sup>459</sup><br>595AKKRKQAKKL VQAKALQQNKD TKKEKETVRRS <sup>629</sup><br>897KRK <sup>899</sup><br>941GRGRRGRSLRQK <sup>952</sup><br>1151PRRVVSSPRKPPQSPR <sup>1166</sup> |
| Cat eye syndrome critical region protein 2 homolog       | <i>M. musculus</i>     | P2P5:<br>479GKGTK <sup>383</sup><br>407GKGTK <sup>411</sup><br>266GKGTK <sup>270</sup>                            | 195GKTGKRRGRPPKRKK <sup>209</sup><br>358KREMEEKVKAVEDRAKRRKL <sup>378</sup><br>537KREKRRSRSGR <sup>547</sup>                                                                                                                                                                      |
| Selenocysteine insertion sequence-binding protein 2-like | <i>M. musculus</i>     | P2P5:<br>480GKGTK <sup>484</sup><br>369GKGTK <sup>373</sup><br>157GKGTK <sup>161</sup>                            | 133KGRRRR <sup>138</sup><br>333KSQKK <sup>337</sup><br>444KAKKGKEKEIAKLKRPTALKKVILKEREKKGR <sup>476</sup>                                                                                                                                                                         |
| E3 ubiquitin-protein ligase UHRF2                        | <i>M. musculus</i>     | P2P5:<br>648GKGTK <sup>652</sup><br>612GKGTK <sup>616</sup><br>424GKGTK <sup>428</sup><br>388GKGTK <sup>392</sup> | 408KLSKKKAK <sup>415</sup>                                                                                                                                                                                                                                                        |

|                                                                               |                        |                                                                                                |                                                                                                                                                                                                                                    |
|-------------------------------------------------------------------------------|------------------------|------------------------------------------------------------------------------------------------|------------------------------------------------------------------------------------------------------------------------------------------------------------------------------------------------------------------------------------|
| Nucleolar protein 56                                                          | <i>G. max</i>          | P2P5:<br>448GKKTK <sup>452</sup>                                                               | 449KKTKKKKQK <sup>457</sup><br>479KSEKKKKKEK <sup>490</sup><br>518KKKKNKKDSNGEAL EAGGESK <sup>547</sup>                                                                                                                            |
| Protein DEK                                                                   | <i>G. max</i>          | P2P5:<br>183GKKTK <sup>187</sup><br>167GKKTK <sup>171</sup>                                    | 91KEKEKAKGKGKRRRSK <sup>123</sup><br>272KGKKRTRKSFP <sup>285</sup>                                                                                                                                                                 |
| SAGA histone acetyltransferase complex subunit SPT7                           | <i>S. cerevisiae</i>   | P2P5:<br>1064GKKTK <sup>1068</sup>                                                             | 333KGKKKRS <sup>339</sup>                                                                                                                                                                                                          |
| E3 ubiquitin-protein ligase TRIM69                                            | <i>M. musculus</i>     | P2P5:<br>386GKKTK <sup>390</sup><br>368GKKTK <sup>372</sup>                                    | No NLS predicted                                                                                                                                                                                                                   |
| PAZ domain-containing protein / piwi domain-containing protein                | <i>A. thaliana</i>     | P2P5:<br>166GKKTK <sup>170</sup>                                                               | No NLS predicted                                                                                                                                                                                                                   |
| AGAMOUS-like-56                                                               | <i>A. thaliana</i>     | P2P5:<br>3GKKTK <sup>7</sup>                                                                   | No NLS predicted                                                                                                                                                                                                                   |
| NAC (No Apical Meristem) domain transcriptional regulator superfamily protein | <i>A. thaliana</i>     | P2P5:<br>157GKKTK <sup>161</sup>                                                               | No NLS predicted                                                                                                                                                                                                                   |
| CDKN2A-interacting protein                                                    | <i>D. rerio</i>        | P2P5:<br>130GKKTK <sup>134</sup><br>129GKKTK <sup>133</sup><br>43GKKTK <sup>47</sup>           | No NLS predicted                                                                                                                                                                                                                   |
| Fap1p                                                                         | <i>S. cerevisiae</i>   | P2P5:<br>559GKKTK <sup>563</sup>                                                               | No NLS predicted                                                                                                                                                                                                                   |
| Serum response factor homolog                                                 | <i>C. elegans</i>      | P2P5:<br>41GKKTK <sup>45</sup>                                                                 | No NLS predicted                                                                                                                                                                                                                   |
| IQ domain-containing protein IQM2                                             | <i>G. max</i>          | P2P5:<br>325GKKTK <sup>329</sup>                                                               | No NLS predicted                                                                                                                                                                                                                   |
| Probable WRKY transcription factor 32                                         | <i>G. max</i>          | P2P5:<br>315GKKTK <sup>319</sup>                                                               | No NLS predicted                                                                                                                                                                                                                   |
| PR domain zinc finger protein 10                                              | <i>D. rerio</i>        | P3P5:<br>425GRRTK <sup>429</sup>                                                               | 405RPKSRGRGRGRKRFGGARRPGRRT <sup>428</sup><br>711RKDKLREHMQRMHNP EREAKKADRIHRTKA <sup>740</sup>                                                                                                                                    |
| Bromodomain testis-specific protein                                           | <i>D. rerio</i>        | P3P5:<br>264GRRTK <sup>268</sup>                                                               | 455KPKKKEKS <sup>499</sup><br>581RKKTETNKNKPPKSKIKEKD <sup>602</sup><br>666TKRKQSKGPGHANKIKKAL <sup>685</sup>                                                                                                                      |
| Xeroderma pigmentosum, complementation group C                                | <i>D. melanogaster</i> | P3P5:<br>1043GRRTK <sup>1047</sup><br>1042GRRTK <sup>1046</sup>                                | 61KRGSDHKAPSGIKGSSVKKRKPTGQS <sup>86</sup><br>269KKAGRG <sup>274</sup><br>295RIK <sup>297</sup><br>542KPKKDKKAGKPAEKESKSTISKEAEKNNAKKAEAKPLSK <sup>582</sup>                                                                       |
| Transcription factor unc-3                                                    | <i>C. elegans</i>      | P3P5:<br>244GRRTK <sup>248</sup>                                                               | No NLS predicted                                                                                                                                                                                                                   |
| Pre-mRNA processing factor 31                                                 | <i>D. discoideum</i>   | P2P3P5:<br>330GKRTK <sup>334</sup>                                                             | 327PEEGKRTKRGGKKARL <sup>342</sup>                                                                                                                                                                                                 |
| Crossover junction endonuclease MUS81                                         | <i>G. max</i>          | P2P3P5:<br>93GKRTK <sup>93</sup>                                                               | 92KGKRTK <sup>97</sup>                                                                                                                                                                                                             |
| Cyclin-D3-1-like                                                              | <i>G. max</i>          | P3P5:<br>311GRRTK <sup>315</sup>                                                               | 313RTKLKKR <sup>319</sup>                                                                                                                                                                                                          |
| Toutatis                                                                      | <i>D. melanogaster</i> | P2P3P5:<br>2611GKRTK <sup>2615</sup><br>2574GKRTK <sup>2578</sup><br>2538GKRTK <sup>2542</sup> | 1088LARNKEKARQEKNSKLEQQRKDKE <sup>1111</sup><br>2511KNKSSKKSSAKKQATPSKKQQQKNKKE <sup>2539</sup><br>2612KRTKKKSGGKRRR <sup>2624</sup><br>2746PPPKKRSAGGTSGSSSKRRDRDRESGGS AKRR <sup>2778</sup><br>3011LKQEKKKEKHATK <sup>3022</sup> |
| Restriction endonuclease, type                                                | <i>A. thaliana</i>     | P2P3P5:                                                                                        | 339KSKEHVKNKSGKKRNS <sup>354</sup>                                                                                                                                                                                                 |

|                                    |                       |                                                             |                        |
|------------------------------------|-----------------------|-------------------------------------------------------------|------------------------|
| II-like superfamily protein        |                       | 267GKRTK271                                                 |                        |
| Fanconi anemia group E protein     | M. musculus           | P2P3P5:<br>193GKRTK197                                      | No NLS predicted       |
| Protein POLLENLESS 3-LIKE 2        | G. max                | P2P3P5:<br>155GKRTK159                                      | No NLS predicted       |
| Transcription factor bhlh91        | G. max                | P2P3P5:<br>193GKRTK197<br>180GKRTK184                       | No NLS predicted       |
| Proliferation marker protein Ki-67 |                       | P5:                                                         | 558GRK560              |
|                                    |                       | 1807GRKTK1811                                               | 627KRQRRP632           |
|                                    |                       | 1636GRKTK1640                                               | 1311RRPR1314           |
|                                    |                       |                                                             | 1526RKPAKR1531         |
|                                    |                       | P2P5:                                                       | 1900RRPR1903           |
|                                    |                       | 2215GKKTK2219                                               | 2137KRRPR2141          |
|                                    |                       | 2071GKKTK2075                                               |                        |
|                                    |                       | 1895GKKTK1899                                               |                        |
|                                    |                       | 1388GKKTK1392                                               |                        |
|                                    |                       | 1244GKKTK1248                                               |                        |
|                                    |                       | 1147GKKTK1151                                               |                        |
|                                    |                       | 1124GKKTK1128                                               |                        |
|                                    |                       | 1068GKKTK1072                                               | 2725RPRRV2729          |
|                                    |                       |                                                             | 2965PVPEKKRAASSKRH2978 |
|                                    |                       |                                                             |                        |
|                                    |                       | P2P3P5:                                                     |                        |
|                                    |                       | 2215GKRTK2219                                               |                        |
|                                    |                       | 1388GKRTK1392                                               |                        |
|                                    |                       | 1147GKRTK1151                                               |                        |
|                                    |                       | 1003GKRTK1007                                               |                        |
|                                    |                       | 827GKRTK831                                                 |                        |
|                                    |                       |                                                             |                        |
|                                    |                       | P2P5:                                                       |                        |
|                                    |                       | 265GKKTK269                                                 |                        |
|                                    |                       |                                                             |                        |
| C2H2-like zinc finger protein      | A. thaliana<br>G. max | P2P3P5:<br>24GKRTK28<br>20GKRTK24<br>18GKRTK22<br>17GKRTK21 | No NLS predicted       |

<sup>1</sup> All listed proteins are known to function in the cell nucleus

<sup>2</sup> NLSs were predicted using NLStradamus (Nguyen et al. 2009; BMC Bioinformatics. 10:202). Overlapping regions of the predicted NLSs containing GRKTR or its variants are highlighted in red.



**Table S6.** BLASTP E-values for nuclear proteins from different cellular organisms reported in Figure 5.<sup>1</sup>

| Variant                        | <i>M. musculus</i>         | <i>H. sapiens</i>           | <i>D. rerio</i>             | <i>G. max</i>               | <i>A. thaliana</i>         | <i>D. melano-</i><br><i>gaster</i> | <i>C. elegans</i>          | <i>S. cerevisiae</i> |
|--------------------------------|----------------------------|-----------------------------|-----------------------------|-----------------------------|----------------------------|------------------------------------|----------------------------|----------------------|
| WT                             | 341.2 ± 0.1<br>(p < 0.001) | 342.6 ± 0.6<br>(p < 0.001)  | 343.0                       | 343.0 ± 0.0<br>(p < 0.001)  | 343.0 ± 0.0<br>(p < 0.001) | 343.0                              | No hit                     | No hit               |
| P2                             | 485.5 ± 0.2<br>(p < 0.001) | 489.5 ± 0.3<br>(p < 0.001)  | 488.25 ± 0.8<br>(p < 0.001) | 490.0 ± 1.3<br>(p < 0.001)  | 491.7 ± 0.9<br>(p < 0.001) | 487.6 ± 0.43                       | 489.0                      | 489.0                |
| P3                             | 242.2 ± 0.5<br>(p < 0.001) | 242.5 ± 0.2<br>(p < 0.001)  | 242.0<br>(p < 0.001)        | 242.5 ± 0.5<br>(p < 0.001)  | 242.0<br>(p < 0.001)       | 243.0                              | 241.0 ± 0.0<br>(p < 0.001) | No hit               |
| P5                             | 487.2 ± 0.6<br>(p < 0.001) | 487.0 ± 0.0<br>(p < 0.001)  | 484.3 ± 0.1<br>(p < 0.001)  | 489.7 ± 0.8<br>(p < 0.001)  | 488.1 ± 1.4<br>(p < 0.001) | 484.0 ± 0.0                        | No hit                     | 486.5 ± 0.50         |
| P2P3                           | 341.3 ± 0.1<br>(p < 0.001) | 342.2 ± 0.3<br>(p < 0.001)  | 341.3 ± 0.2<br>(p < 0.001)  | 345.8 ± 1.6<br>(p < 0.001)  | 344.0 ± 0.3<br>(p < 0.001) | 342.0                              | No hit                     | No hit               |
| P2P5                           | 691.4 ± 0.9<br>(p < 0.001) | 689.9 ± 0.57<br>(p < 0.001) | 691.4 ± 1.0<br>(p < 0.001)  | 690.6 ± 0.2<br>(p < 0.001)  | 698.3 ± 2.3<br>(p < 0.001) | No hit                             | 692.0 ± 2.0<br>(p < 0.001) | 688.5 ± 0.50         |
| P3P5                           | No hit                     | 343.5 ± 0.5<br>(p < 0.001)  | 342.0 ± 0.0<br>(p < 0.001)  | No hit                      | No hit                     | 342.0 ± 0.0                        | 344.0<br>(p < 0.001)       | No hit               |
| P2P3P5                         | 489.3 ± 1.5<br>(p < 0.001) | No hit                      | No hit                      | 488.2 ± 0.42<br>(p < 0.001) | 487.5 ± 0.7<br>(p < 0.001) | 484.0 ± 0.0                        | No hit                     | No hit               |
| Random<br>peptide<br>(GLVTV)   | 751.9 ± 1.8                | 755.7 ± 2.0                 | 753.2 ± 0.5                 | 752.0 ± 0.0                 | 753.0                      | No hit                             | 757.4 ± 3.1                | No hit               |
| SV40 Large<br>T-antigen<br>NLS | No hit                     | No hit                      | No hit                      | No hit                      | No hit                     | No hit                             | No hit                     | No hit               |

<sup>1</sup> Mean of E-values ± standard error of the mean are listed. E-values for each cellular organism were compared with that of the corresponding random peptide by One-way ANOVA followed by Tukey's test using GraphPad Prism (GraphPad Software, Inc., La Jolla, CA).
